# Supplementary material for: Highly effective chemosensor of a luminescent silica@lanthanide complex@MOF heterostructured composite for metal ion sensing
Source: Royal Society of Chemistry journal article supplement (doi:10.1039/c5ra19973e), 2015-01-01
Supplement: c5ra19973e1.pdf [file c5ra19973e1.pdf]

## Highly effective chemosensor of luminescent silica@lanthanide complex@MOF heterostructure composite for metal ion sensing

Chang Liu<sup>a</sup> and Bing Yan<sup>b\*</sup>

Department of Chemistry, Tongji University, Siping Road 1239, Shanghai 200092, China

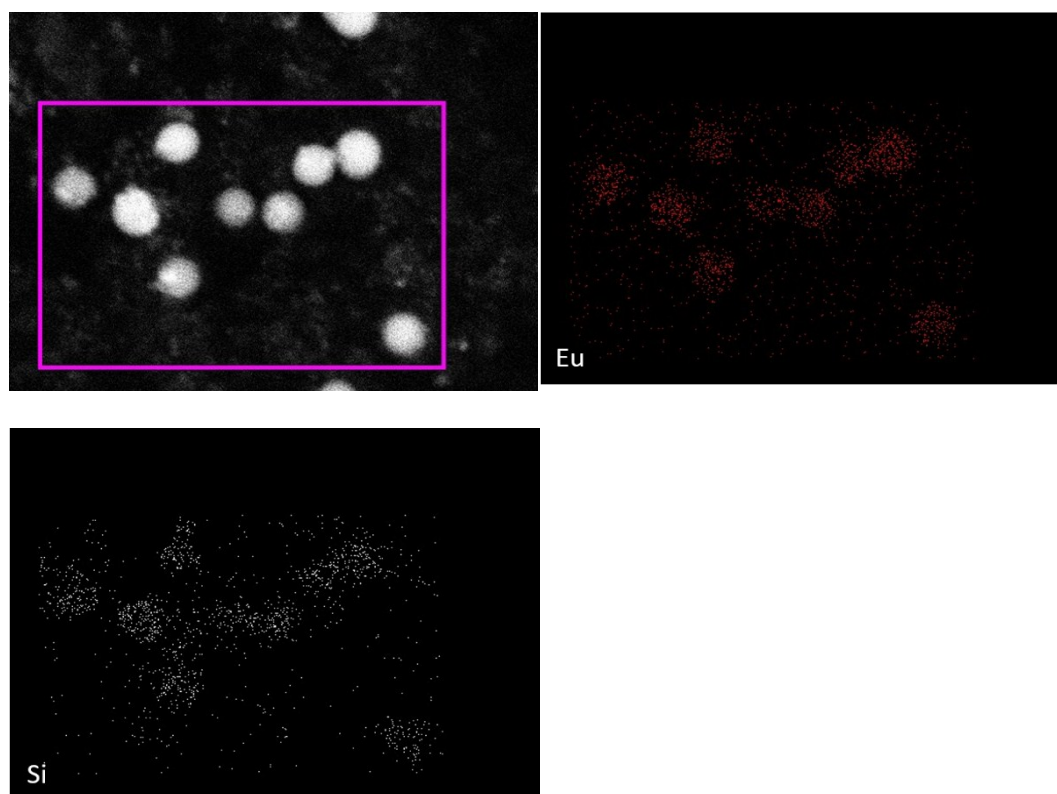

Figure S1 SEM images and corresponding elemental mappings of SiO<sub>2</sub>@ETTA.

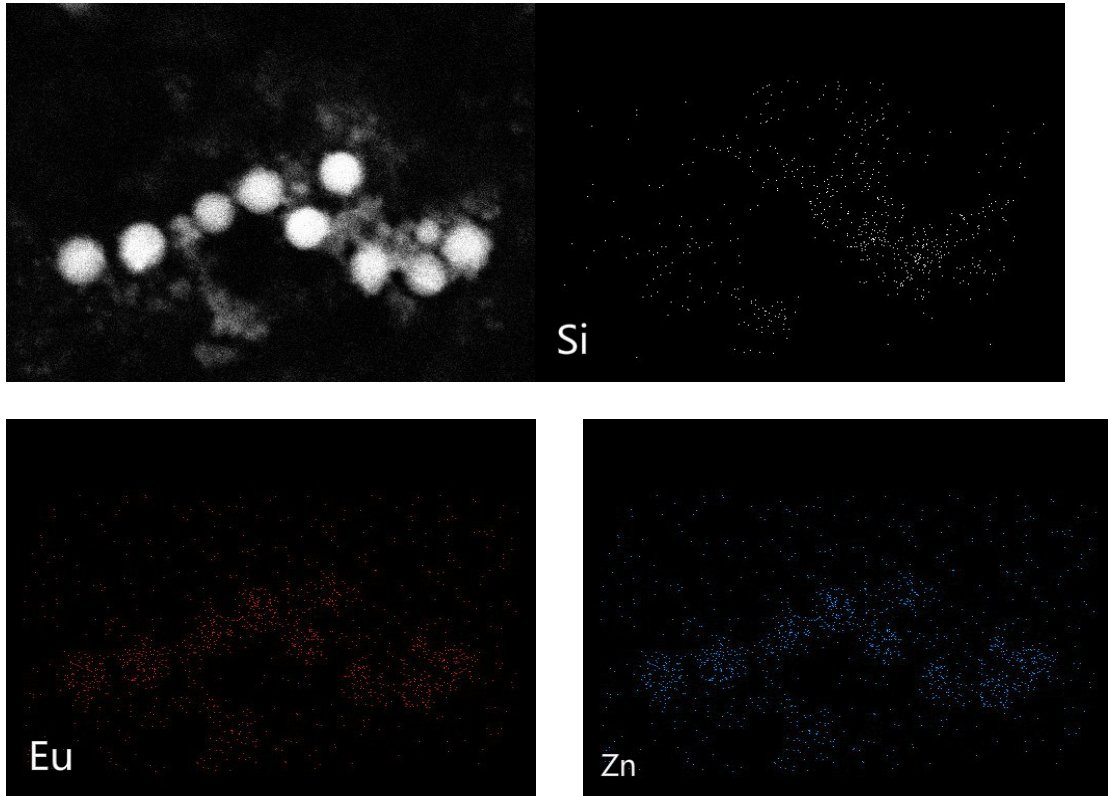

**Figure S2** SEM images and corresponding elemental mappings of  $\text{SiO}_2@ETTA@ZIF-8$ .

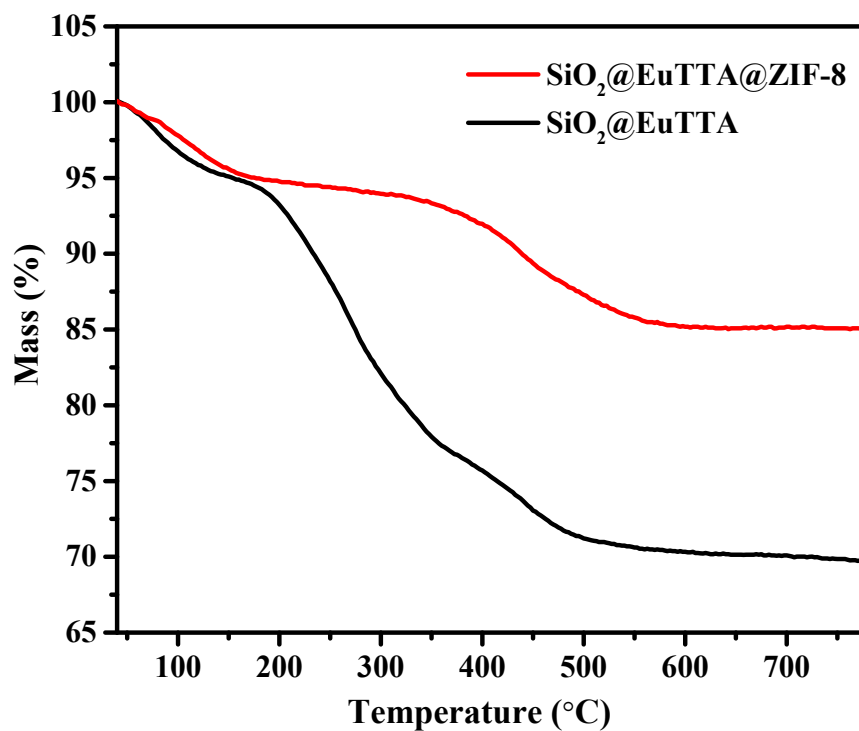

Figure S3 Thermogravimetric analysis of SiO<sub>2</sub>@EuTTA and SiO<sub>2</sub>@EuTTA@ZIF-8.

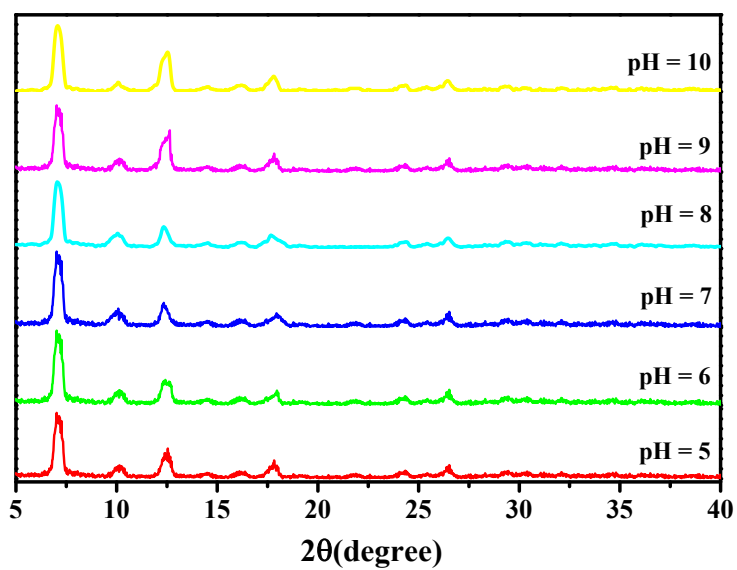

Figure S4 PXRD profiles for SiO<sub>2</sub>@ETTA@ZIF-8 soaked aqueous solutions with pH values of 5–10 for 24 h.

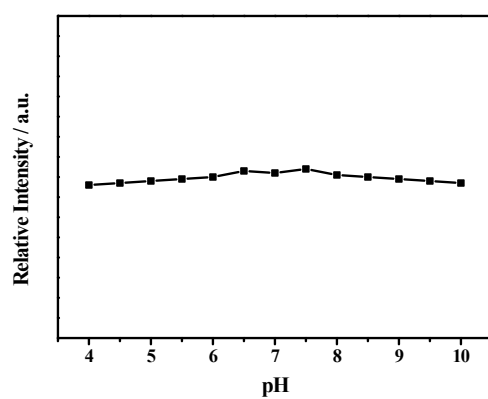

**Figure S5** The fluorescent stability of SiO<sub>2</sub>@EuTTA@ZIF-8 t in a series of pH solutions upo0n excitation 396nm.

**Table S1** Response of luminescence lifetime of SiO<sub>2</sub>@EuTTA@ZIF-8 towards aqueous solutions of various metal cations.

| Metal ions       | $\tau$ ( $\mu$ s) |
|------------------|-------------------|
| Original         | 509               |
| Cd <sup>2+</sup> | 653               |
| Ca <sup>2+</sup> | 500               |
| Ni <sup>2+</sup> | 649               |
| Fe <sup>3+</sup> | 515               |
| Hg <sup>2+</sup> | 734               |
| Pb <sup>2+</sup> | 723               |
| Co <sup>2+</sup> | 664               |
| Fe <sup>2+</sup> | 423               |
| Cu <sup>2+</sup> | 12                |
